# Supplementary material
Source: bioRxiv or medRxiv preprint supplement (https://www.biorxiv.org/highwire/filestream/13750/field_highwire_adjunct_files/1/050328-2.pdf)
Supplement: Supplementary file [file 050328-2.pdf]

Supplemental Table 2. Novel LOS class description

| orthologue                    | RAST ID                   | product                                                        | seq length (AA) |
|-------------------------------|---------------------------|----------------------------------------------------------------|-----------------|
| <i>C. coli</i> (153) Class X  |                           |                                                                |                 |
| 25                            | fig 6666666.94320.peg.358 | lipopolysaccharide heptosyltransferase I                       | 342             |
| 12                            | fig 6666666.94320.peg.357 | lipid A biosynthesis lauroyl acyltransferase                   | 295             |
| 16                            | fig 6666666.94320.peg.356 | lipooligosaccharide biosynthesis glycosyltransferase, putative | 516             |
| 1850                          | fig 6666666.94320.peg.355 | putative glycosyltransferase                                   | 350             |
| 1668                          | fig 6666666.94320.peg.354 | putative lipopolysaccharide 1,3-galactosyltransferase          | 399             |
| 8                             | fig 6666666.94320.peg.353 | hypothetical protein                                           | 364             |
| 1                             | fig 6666666.94320.peg.352 | hypothetical protein                                           | 406             |
| 2                             | fig 6666666.94320.peg.351 | hypothetical protein                                           | 319             |
| 3                             | fig 6666666.94320.peg.350 | UDP-N-acetylglucosamine 2-epimerase                            | 373             |
| 1821                          | fig 6666666.94320.peg.349 | hypothetical protein                                           | 147             |
| 1967                          | fig 6666666.94320.peg.348 | hypothetical protein                                           | 138             |
| 1742                          | fig 6666666.94320.peg.347 | hypothetical protein                                           | 340             |
| 1743                          | fig 6666666.94320.peg.346 | hypothetical protein                                           | 292             |
| 10                            | fig 6666666.94320.peg.345 | putative glucosyltransferase                                   | 278             |
| 23                            | fig 6666666.94320.peg.344 | ADP-heptose--LPS heptosyltransferase II                        | 321             |
| <i>C. coli</i> (138) Class XI |                           |                                                                |                 |
| 25                            | fig 195.111.peg.264       | lipopolysaccharide heptosyltransferase I                       | 342             |
| 12                            | fig 195.111.peg.263       | lipid A biosynthesis lauroyl acyltransferase                   | 295             |
| 16                            | fig 195.111.peg.262       | lipooligosaccharide biosynthesis glycosyltransferase, putative | 516             |
| 1850                          | fig 195.111.peg.261       | putative glycosyltransferase                                   | 350             |
| 1668                          | fig 195.111.peg.260       | putative lipopolysaccharide 1,3-galactosyltransferase          | 399             |
| 8                             | fig 195.111.peg.259       | hypothetical protein                                           | 364             |
| 1                             | fig 195.111.peg.258       | hypothetical protein                                           | 406             |
| 2                             | fig 195.111.peg.257       | hypothetical protein                                           | 319             |
| 3                             | fig 195.111.peg.256       | hypothetical protein                                           | 373             |
| 1821                          | fig 195.111.peg.255       | hypothetical protein                                           | 147             |
| 1920                          | fig 195.111.peg.254       | hypothetical protein                                           | 131             |
| 1742                          | fig 195.111.peg.253       | hypothetical protein                                           | 340             |
| 1743                          | fig 195.111.peg.252       | hypothetical protein                                           | 292             |
| 10                            | fig 195.111.peg.251       | putative glucosyltransferase                                   | 278             |
| 23                            | fig 195.111.peg.250       | ADP-heptose--LPS heptosyltransferase II                        | 321             |
| <i>C. coli</i> (99) class XII |                           |                                                                |                 |
| 25                            | fig 195.104.peg.1519      | lipopolysaccharide heptosyltransferase I                       | 342             |
| 12                            | fig 195.104.peg.1518      | lipid A biosynthesis lauroyl acyltransferase                   | 295             |
| 16                            | fig 195.104.peg.1517      | lipooligosaccharide biosynthesis glycosyltransferase, putative | 516             |
| 1850                          | fig 195.104.peg.1516      | putative glycosyltransferase                                   | 350             |
| 8                             | fig 195.104.peg.1515      | hypothetical protein                                           | 364             |
| 1790                          | fig 195.104.peg.1514      | hypothetical protein                                           | 355             |
| 4                             | fig 195.104.peg.1513      | methyltransferase type 12                                      | 216             |
| 5                             | fig 195.104.peg.1512      | hypothetical protein                                           | 211             |
| 7                             | fig 195.104.peg.1511      | phosphoserine phosphatase                                      | 199             |
| 2965                          | fig 195.104.peg.1510      | hypothetical protein                                           | 333             |
| 1821                          | fig 195.104.peg.1509      | hypothetical protein                                           | 147             |
| 1920                          | fig 195.104.peg.1508      | hypothetical protein                                           | 131             |
| 1742                          | fig 195.104.peg.1507      | hypothetical protein                                           | 340             |
| 1743                          | fig 195.104.peg.1506      | hypothetical protein                                           | 292             |
| 10                            | fig 195.104.peg.1505      | putative glucosyltransferase                                   | 278             |
| 23                            | fig 195.104.peg.1504      | ADP-heptose--LPS heptosyltransferase II                        | 321             |
